# Supplementary material for: Improving the effectiveness of performance feedback by considering personality traits and task demands
Source: PubMed Central journal article supplement (PMC5963754; doi:10.1371/journal.pone.0197810), 2018-05-22
Supplement: pone.0197810.s001.pdf [file pone.0197810.s001.pdf]

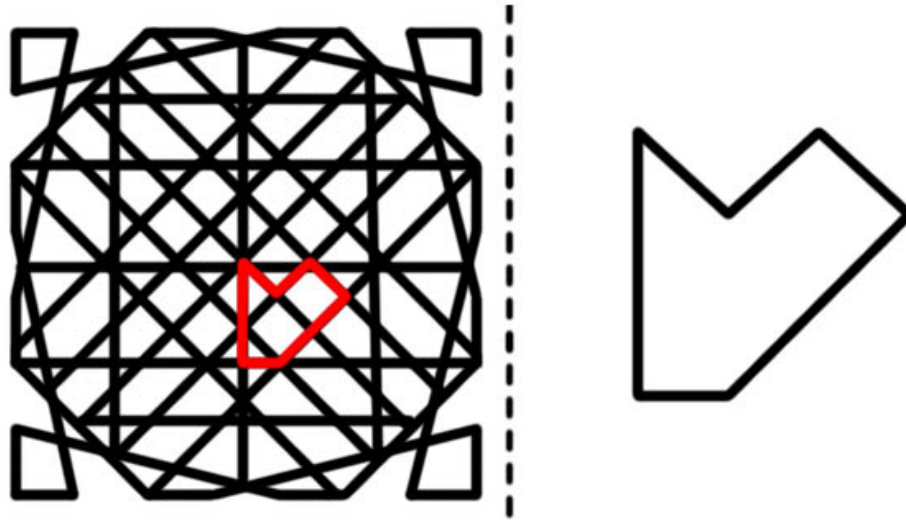

S1 Fig. Difficult Puzzle Task Example.
