# Supplementary material for: Improving the effectiveness of performance feedback by considering personality traits and task demands
Source: PubMed Central journal article supplement (PMC5963754; doi:10.1371/journal.pone.0197810), 2018-05-22
Supplement: pone.0197810.s002.pdf [file pone.0197810.s002.pdf]

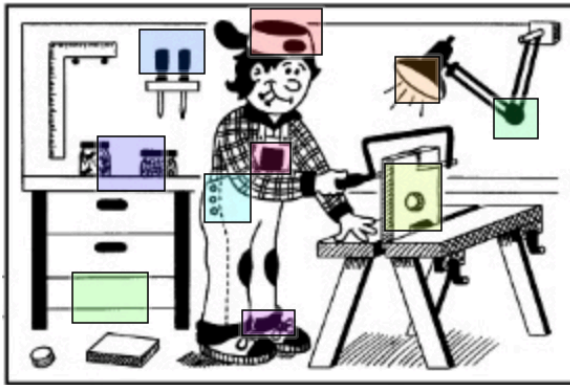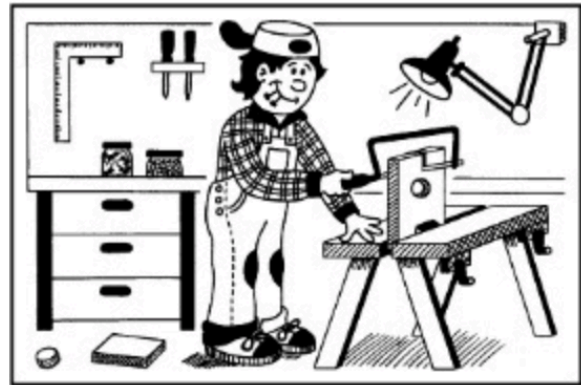

S2 Fig. Playful Puzzle Task Example.
