# Supplementary material for: Improving the effectiveness of performance feedback by considering personality traits and task demands
Source: PubMed Central journal article supplement (PMC5963754; doi:10.1371/journal.pone.0197810), 2018-05-22
Supplement: pone.0197810.s003.pdf [file pone.0197810.s003.pdf]

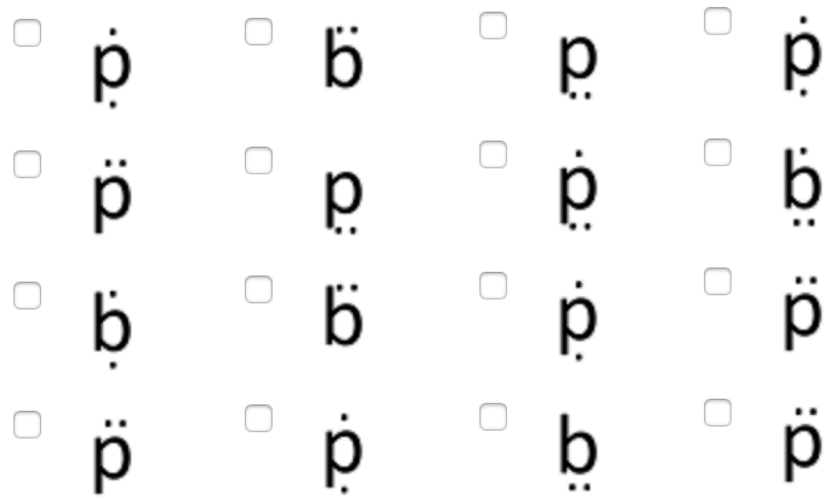

**S3 Fig. Neutral Puzzle Task Example.**
